# Supplementary material for: A WS2nanosheet based sensing platform for highly sensitive detection of T4 polynucleotide kinase and its inhibitors
Source: Royal Society of Chemistry journal article supplement (doi:10.1039/c4nr00944d), 2014-01-01

## Supplementary Material

### **A WS<sub>2</sub> nanosheet based sensing platform for highly sensitive detection of T4 polynucleotide kinase and its inhibitors**

Jia Ge, Li-Juan Tang, Qiang Xi, Xi-Ping Li, Ru-Qin Yu\*, Jian-Hui Jiang,  
and Xia Chu\*

\*Corresponding author.

State Key Laboratory for Chemo/biosensing and Chemometrics, College of Chemistry  
and Chemical Engineering, Hunan University, Changsha, 410082, PR China

Tel.: +86 731 88821916; Fax: +86 731 88821916. E-mail address: rquy@hnu.edu.cn;  
xiachu@hnu.edu.cn

**Fig. S1.** Values of the  $\zeta$  potential for WS<sub>2</sub> nanosheets.

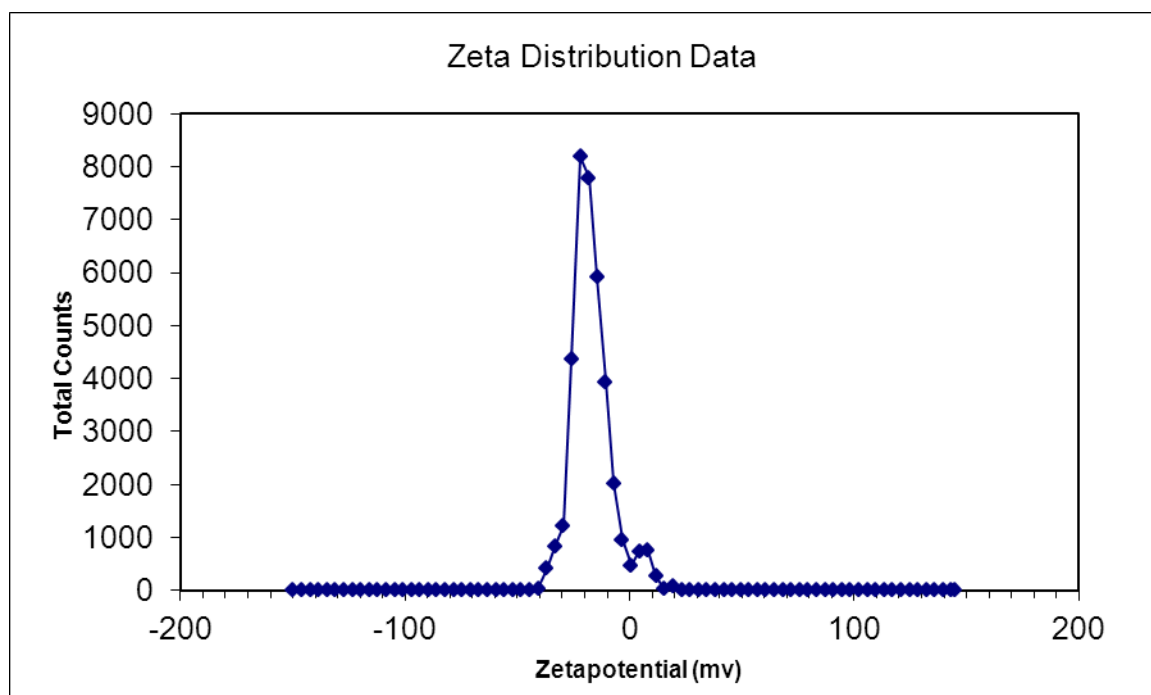

**Fig. S2.** Fluorescence intensities of (a) 100 nM P1 and (b) 100 nM FAM labeled

dsDNA via time in the presence of 20  $\mu\text{L}$  of  $\text{WS}_2$  nanosheets. The assays were all carried out in the Tris-HCl buffer. (P1 100 nM, FAM labeled dsDNA 100 nM,  $\lambda$  exonuclease 10U,  $\text{WS}_2$  5  $\mu\text{g mL}^{-1}$ )

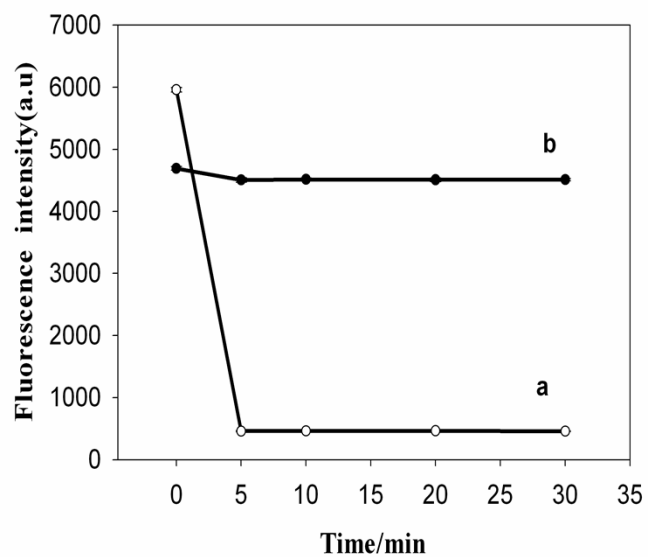

**Fig. S3.** Fluorescence intensity histogram of P1 +  $\text{WS}_2$  (black histogram) and FAM

labeled dsDNA + WS<sub>2</sub> (gray histogram) in the presence of 0, 1, 2, 4, 5, and 6 μg mL<sup>-1</sup> WS<sub>2</sub> nanosheets (P1 100 nM, FAM labeled dsDNA 100 nM).

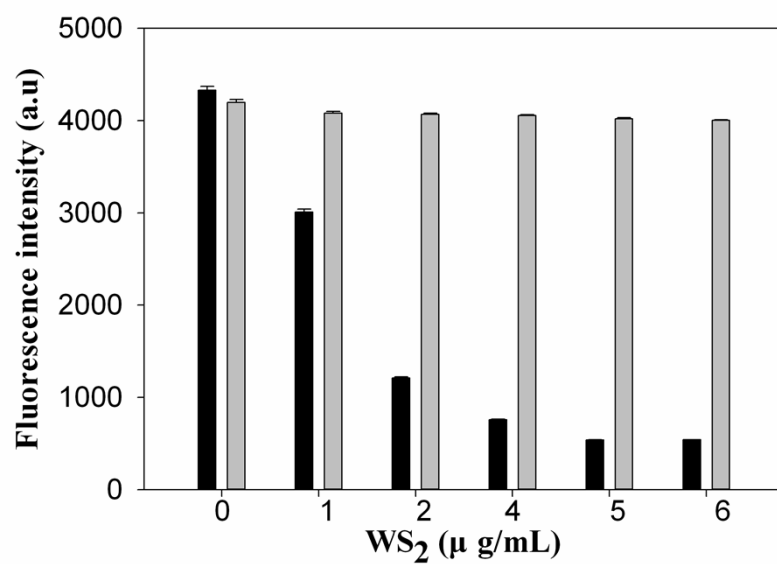

**Fig. S4.** (A) Optimization of the reaction time. The concentrations of ATP and  $\lambda$

exonuclease were 0.5 mM and 10 units, respectively. (B) Optimization of  $\lambda$  exonuclease concentration. The concentration of ATP was 0.5 mM. (C) Optimization of ATP concentration. The concentration of  $\lambda$  exonuclease was 10 units. (FAM labeled dsDNA 100 nM, T4 PNK 10 U mL<sup>-1</sup>, WS<sub>2</sub> 5  $\mu$ g mL<sup>-1</sup>).

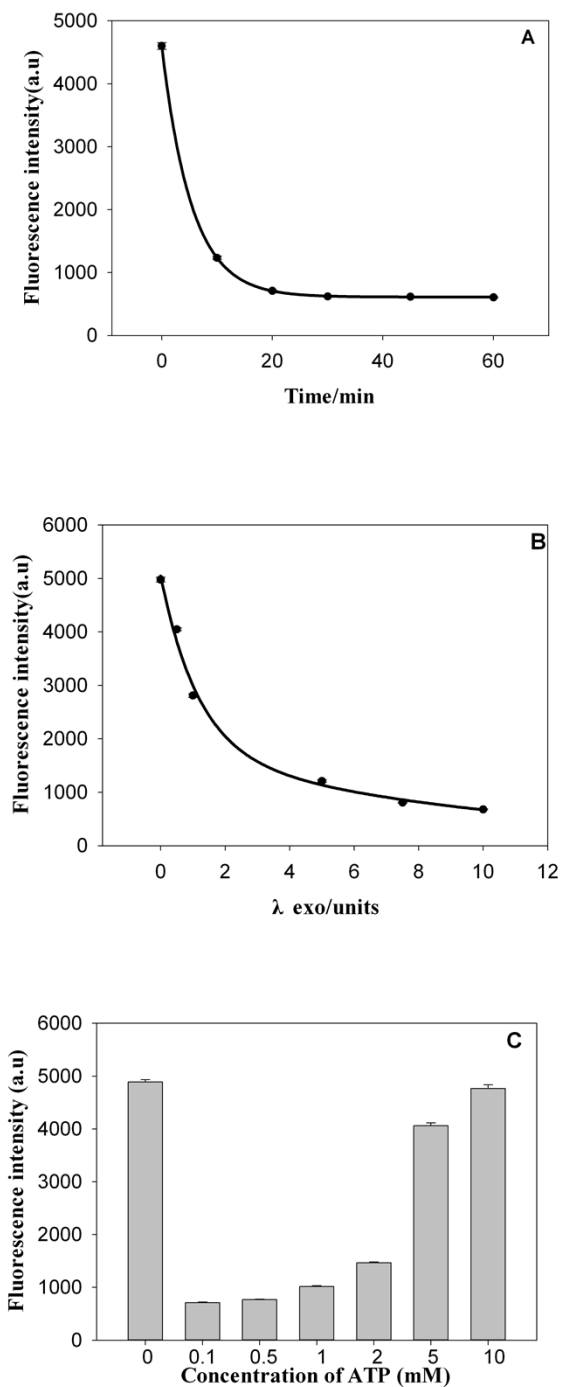

Fig. S5. Fluorescence spectra of P1 without (a) and with (d) incubation with 20  $\mu$ L

WS<sub>2</sub> nanosheets. Fluorescence spectra of FAM labeled dsDNA after incubation without (b) and with (c) 20  $\mu$ L WS<sub>2</sub> nanosheets. The assays were all carried out in the reaction buffer containing 1% (v/v) cell extracts. (P1 100 nM, FAM labeled dsDNA 100 nM, WS<sub>2</sub> 5  $\mu$ g mL<sup>-1</sup>).

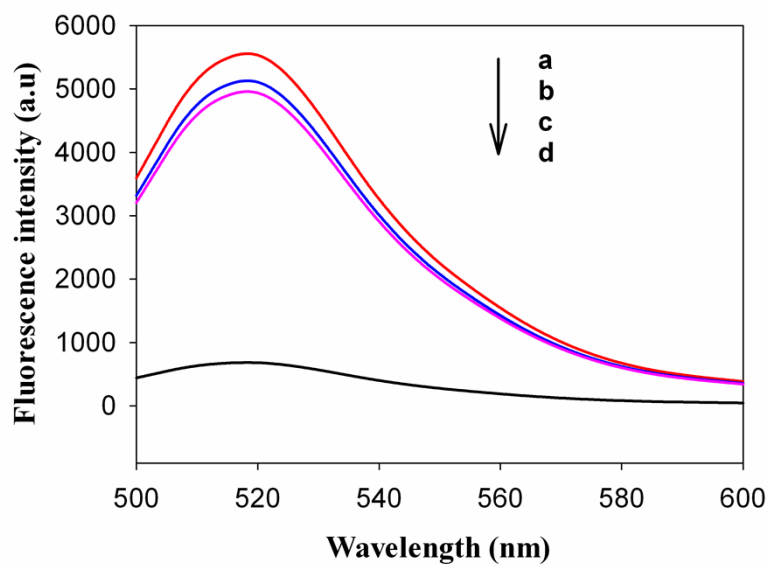

**Fig. S6.** The selectivity of the WS<sub>2</sub> nanosheets-based strategy for T4 PNK assay. The

concentrations of all enzymes were 10U mL<sup>-1</sup>. Error bars were estimated from three replicate measurements. (FAM labeled dsDNA 100 nM, ATP 0.5 mM,  $\lambda$  exonuclease 10U, WS<sub>2</sub> 5  $\mu$ g mL<sup>-1</sup>).

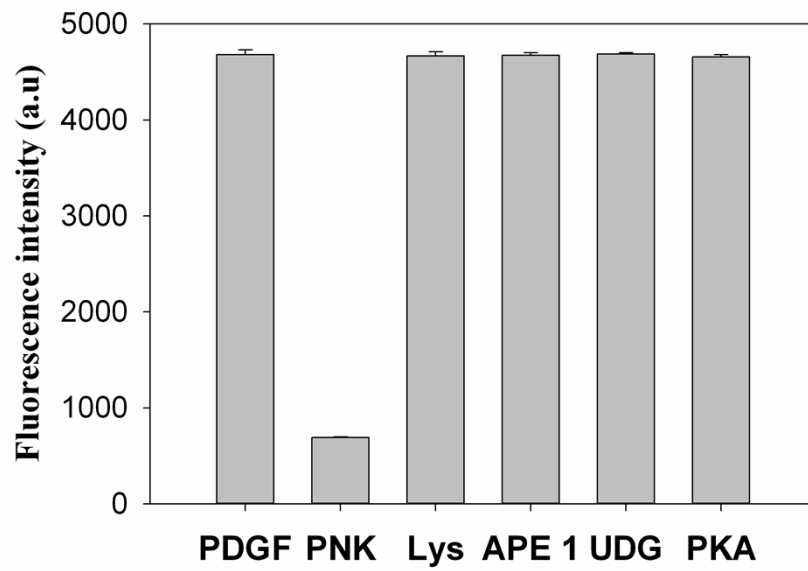

Supplement: c4nr00944d1.pdf [file c4nr00944d1.pdf]
